# Supplementary material
Source: PubMed Central journal article supplement (PMC3522866)
Supplement: NIHMS241097-supplement-S3.pdf [file NIHMS241097-supplement-S3.pdf]

S3 | Secondary SaPI *attS* sites in *Staphylococcus aureus* and *Listeria monocytogenes*

| Species | Left flank            | <i>attS</i>        | Right flank           | Location |
|---------|-----------------------|--------------------|-----------------------|----------|
| Sa WT   | TGAAAAATACAATGGTGCAG  | TTATTTAGCAGGAATAA  | ATCATATTAATGGCTCAGTA  | SA0771   |
| Sa      | CGAGCGTCGGTGGCGTTG    | TAATTCTCCAGGAATAC  | TGTACAAGTGGCTTTGGGTT  | SA0173   |
| Sa      | TTCTTTAAAGCCATTGAGCT  | TTATTATGTAGGAGTGA  | TATTGTATTCATCATATCAT  | SA0537   |
| Sa      | ACAACATAATGATAAGGACTT | TTGTTAGAGAGGAATAA  | TTATGTATAAACGTTAATAA  | SA0685   |
| Sa      | TTGTCTTTATATTATTAC    | TTATTACTGCAGATCAA  | CTGCGTCATCTACTGATTCA  | SA0849   |
| Sa      | TGCCGAAATAGAACCTGCAG  | TGGTTTAGCTGGATTTA  | TCATTTTCCACCGTGTTAG   | SA1385   |
| Sa      | TCTCGCAATATGAGGTGCAA  | TAGCTTTTTAGGATGAA  | ATACCACCGACAACCTGAAAT | SA1977   |
| Sa      | GTAATTTTATTATTAACAT   | TTAATATTGCGGTAAAA  | TATTCGCATCATATGTTCTT  | SA2423   |
| Lm      | GTATTTTCATTTGTGCTCTG  | TTATTCAACAGGTAATAA | TTTCTTGCACCTCAGATTCA  | lmo0146  |
| Lm      | GAATATAATGGTTCCTGCAG  | AATAACTGCAGGAATAA  | CCTGACGATATACCTGCGAC  | lmo0195  |
| Lm      | GCGCTACCTTCAAAAACGAG  | TTATTGACGAGGAAAAG  | TTCCGATATTCGTAAAACCT  | lmo0439  |
| Lm      | TGAAAGAAGAAAATGTAATAA | TTACATAGAAGGAATAA  | TCCACAAAATCCTGGTGGAC  | lmo2370  |
| Lm      | CGAAAGAATTGAGTTATTA   | TGATTGCGCCAGGAATAA | TCGTGGCAAAGTTTTCTCTA  | lmo2500  |
| Lm      | GCAAGTCAACCAAAATTGAAG | TTGTTGAAAGGATTA    | CAGACAGCGAATCTAGCTAT  | lmo2592  |
| Lm      | CTACCCTAACTATTTTCGA   | TTACCTAGGGGAATAA   | CAGTATCTTATTTGTAATTA  | lmo2773  |
