# Supplementary material
Source: PubMed Central journal article supplement (PMC3522866)

S4 | **Lineup of dUTPases and dUTPases of staphylococcal phages.** Sequences were aligned by the PRALINE program, which uses the colours of the rainbow to indicate relative overall conservation at each position, with red being the most conserved, blue the least.

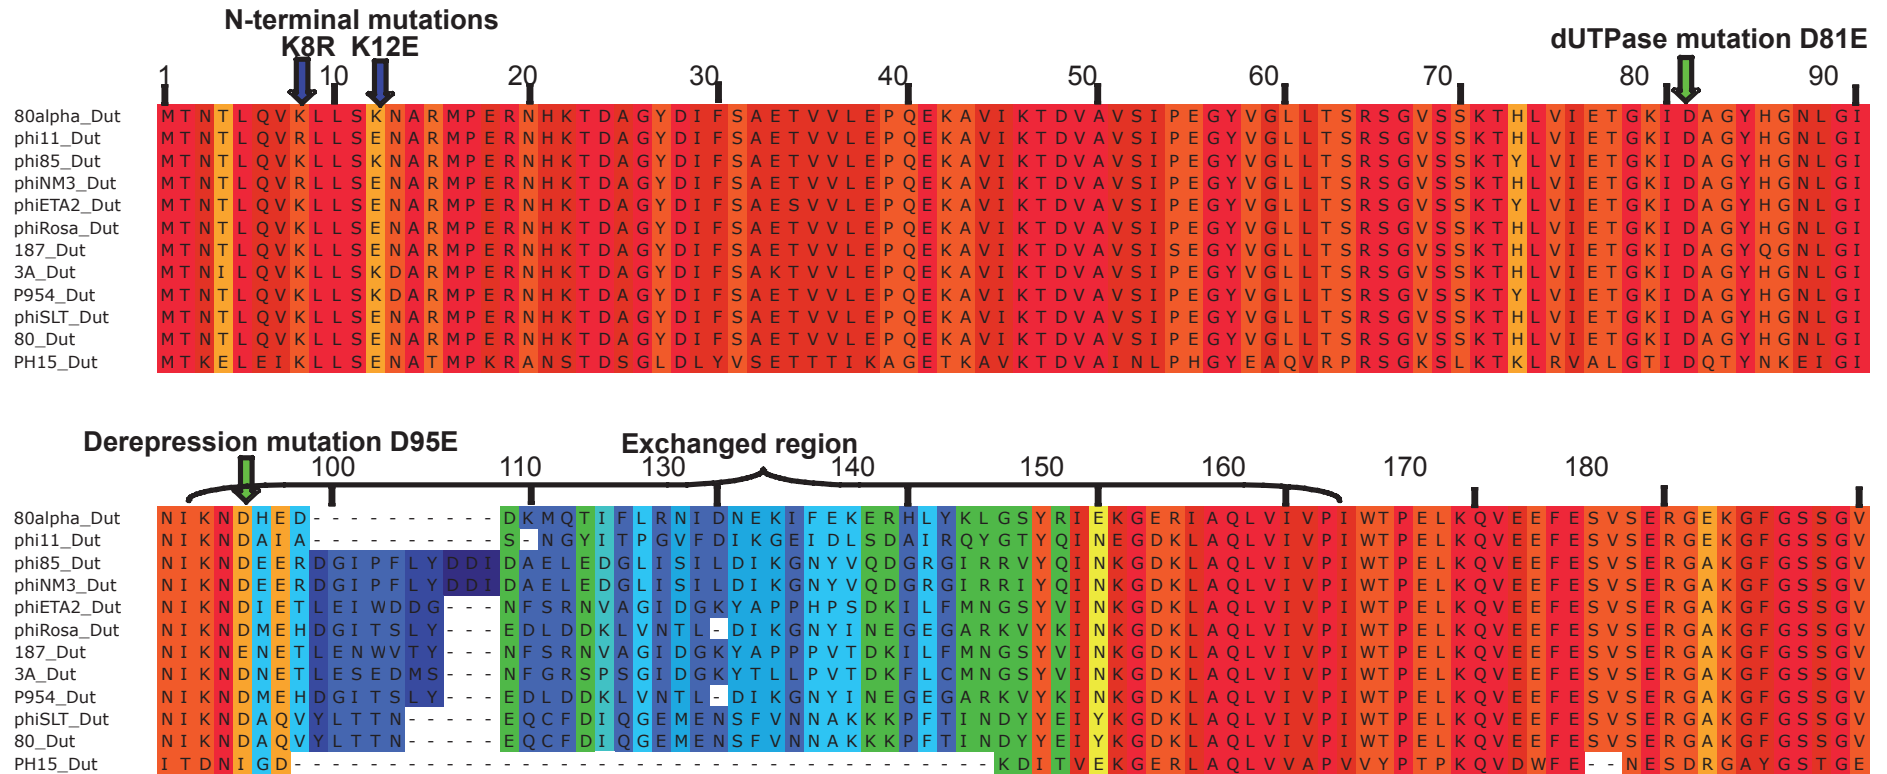

Supplement: NIHMS241097-supplement-S4.pdf [file NIHMS241097-supplement-S4.pdf]
