# Supplementary material
Source: PubMed Central journal article supplement (PMC3522866)
Supplement: NIHMS241097-supplement-S5.pdf [file NIHMS241097-supplement-S5.pdf]

## S5 | SaPI specificity of inducing genes

| Phage                           | SaPIbov1 | SaPIbov2 | SaPI1 | SaPI2 |
|---------------------------------|----------|----------|-------|-------|
| 80 $\alpha$                     | +++*     | +++      | +++   | +++   |
| 80 $\alpha$ $\Delta$ <i>dut</i> | -        | +++      | +++   | -     |
| 80 $\alpha$ $\Delta$ <i>sri</i> | +++      | +++      | -     | +++   |
| 80 $\alpha$ $\Delta$ 15         | +++      | -        | +++   | +++   |
| $\phi$ 11                       | +++      | -        | -     | +++   |
| $\phi$ 11 $\Delta$ <i>dut</i>   | -        | -        | -     | -     |

\*+++ = normal SaPI induction; - = no SaPI induction
