# Supplementary material
Source: PubMed Central journal article supplement (PMC3522866)
Supplement: NIHMS241097-supplement-S6.pdf [file NIHMS241097-supplement-S6.pdf]

| S6   SaPI <i>pif</i> gene products |                                                                      |
|------------------------------------|----------------------------------------------------------------------|
|                                    | 1                                                                    |
| SaPIbov1                           | MDKEQLKKYIYDYVKEYKEIPIYQLEDLFKEMNHDIIGRTSITHDKDENVFWSGWNKI           |
| SaPI2                              | MDKEQLKKYIYDYVKEYKEIPIYQLEDLFKEMNHDIIGRTSVTHDKDENIVFWSGWNKI          |
| SaPI122                            | MDKEQLKKYIIEYVKEYKEIPIYQLEDLFKEINHDIIGRTSITHDKDENIVFWSGWNKI          |
| SaPImu3A                           | MDKEQLKKYIIEYVKEYKEIPIYQLEDLFKEINHDIIGRTSITHDKDENIVFWSGWNKI          |
| SaPIml                             | MDKEQLKKYIIEYVKEYKEIPIYQLEDLFKEINHDIIGRTSITHDKDENIVFWSGWNKI          |
| SaPIn1                             | MDKEQLKKYIIEYVKEYKEIPIYQLEDLFKEINHDIIGRTSITHDKDENIVFWSGWNKI          |
| SaPI4                              | MDKEQLKKYIIEYVKEYKEIPIYQLEDLFKEINHDIIGRTSITHDKDENIVFWSGWNKI          |
| SaPIbov2                           | MEKEQLKQYMYDYVKEHKEIPIYQLEDLFKELDHDYKKGKTSVTHDQDNIVFWSGWNKL          |
| SaPI3                              | MNKNQLKSEILEYIKAHAGTSFVEIERVFEENNFDYKGDGAYTSGQHPNVVFWIGWNQE          |
| SaPI1                              | MNKNQLKSEILEYIKGHAGTSFVEIERVFEENNFDYKGDGAYTSGQHPNVVFWIGWNQE          |
| SaPIml4                            | MNKNQLKSEILEYIKAHAGTSFVEIERVFEENNFDYKGDGAYTSGQHPNVVFWIGWNQE          |
| SaPImu3B                           | MNKNQLKSEILEYIKAHAGTSFVEIERVFEENNFDYKGDGAYTSGQHPNVVFWIGWNQE          |
| SaPI5                              | MNRNRMKQIILEYIKNNDSTSFVEIENVFEEQGFKYKNGAYTSGNHKNIIFWVGWNEE           |
| SaPImw2                            | MNRNRMKQIILEYIKNNDSTSFVEIENVFEEQGFKYKNGAYTSGNHKNIIFWVGWNEE           |
| ShPI1                              | KN-IQSKLI--DYIKDNAGTSFVEIEKVFDENGFDYKQGAYTSLENSNIIVFWYGNKQ           |
|                                    | 60                                                                   |
|                                    | 118                                                                  |
| SaPIbov1                           | TMFALIELVKSEQLDLVYRGSFVMRYLLDGRVPNLPLAICYPEDGQQTDPVPSWVPMVLRINKEEKIK |
| SaPI2                              | TMFALIELVKSEQLDLVYRGSFVMRYLLDGRVPNLPLAICYPEDGQQTDPVPSWVPMVLRINKEEKIK |
| SaPI122                            | TMFALIELVKSEQLDLVYRGSFIMRYLLDGRVPNLPLAICYPEDGQQTDPVPSWVPMVLRIN       |
| SaPImu3A                           | TMFALIELVKSEQLDLVYRGSFIMRYLLDGRVPNLPLAICYPEDGQQTDPVPSWVPMVLRIN       |
| SaPIml                             | TMFALIELVKSEQLDLVYRGSFIMRYLLDGRVPNLPLAICYPEDGQQTDPVPSWVPMVLRIN       |
| SaPIn1                             | TMFALIELVKSEQLDLVYRGSFIMRYLLDGRVPNLPLAICYPEDGQQTDPVPSWVPMVLRIN       |
| SaPI4                              | TMFALIELVKSEQLDLVYRGSFIMRYLLDGRVPNLPLAICYPEDGQQTDPVPSWVPMVLRIN       |
| SaPIbov2                           | TMYALIDLKGEHLDLIYRGSYVMRYLLDGRVPNLPLAITYPEYGQQTTEVPSWVPMVLRVAK       |
| SaPI3                              | AFDVIAELKKDRRIEMDICEPIV--YMVDGKGLDLPV-----RSKNIKTDHWLPVTF'TISKKE     |
| SaPI1                              | AFDVIAELKKDRRIEMDICEPIV--YMVDGKGLDLPV-----RSKNIKTDHWLPVTF'TISKKE     |
| SaPIml4                            | AFDVIAELKKDRRIEMDICEPIV--YMVDGKGLDLPV-----SSKNIKTDHWLPVTF'TISKKE     |
| SaPImu3B                           | AFDVIAELKKDRRIEMDICEPIV--YMVDGKGLDLPV-----SSKNIKTDHWLPVTF'TISKKE     |
| SaPI5                              | AFNIVADLKRDLIEMQIC-PP-MYYLIDGKGLRPLV-----KNKNIKTDHWLPVTF'SL          |
| SaPImw2                            | AFNIGADLKRDLIEMQIC-PP-MYYLIDGKGLRPLV-----KNKNIKTDHWLPVTF'SL          |
| ShPI1                              | AFDVVSELVNDGVIEMQCESII--YMVDGKGLNFPIL-----KSDNVDTYHWLPVTF'FAINKNEK   |
