# Supplementary material
Source: PubMed Central journal article supplement (PMC3522866)
Supplement: NIHMS241097-supplement-S7.pdf [file NIHMS241097-supplement-S7.pdf]

S7 | Transduction of SaPIs and plasmids to *Listeria monocytogenes*<sup>1</sup>

| Recipient Strain | Species | Donor phage lysate/strain with the island or plasmid indicated |                     |                     |                     |
|------------------|---------|----------------------------------------------------------------|---------------------|---------------------|---------------------|
|                  |         | 80α/SaPI1                                                      | 80α/SaPIbov1        | φ11/SaPIbov1        | 80α/pRN8214         |
| RN 4220 (tru)    | Sa      | 1.1×10 <sup>9</sup>                                            |                     |                     | 1.2×10 <sup>8</sup> |
| RN 8403 (tru)    | Lm      | <1                                                             | <1                  | <1                  | <1                  |
| RN 8404 (tru)    | Lm      | 2.2×10 <sup>4</sup>                                            | 4.4×10 <sup>2</sup> | 3.5                 | 4.9×10 <sup>2</sup> |
| RN 8405 (tru)    | Lm      | 5.0×10 <sup>6</sup>                                            | 1.7×10 <sup>4</sup> | 1.1×10 <sup>3</sup> | 1.1×10 <sup>4</sup> |
| RN 8406 (tru)    | Lm      | 2.2×10 <sup>8</sup>                                            | 2.8×10 <sup>5</sup> | 1.6×10 <sup>4</sup> | 1.8×10 <sup>6</sup> |
| RN 8407 (tru)    | Lm      | 7.2×10 <sup>7</sup>                                            | 6.0×10 <sup>4</sup> | 5.0×10 <sup>3</sup> | 1.4×10 <sup>5</sup> |
| RN 8408 (tru)    | Lm      | 1.4×10 <sup>6</sup>                                            | 1.4×10 <sup>3</sup> | 26                  | 5.8×10 <sup>3</sup> |
| RN 8409 (tru)    | Lm      | <1                                                             | <1                  | <1                  | <1                  |
| RN 8410 (tru)    | Lm      | <1                                                             | <1                  | <1                  | <1                  |
| RN4220 (pfu)     | Sa      | 1.3×10 <sup>9</sup>                                            | 7.5×10 <sup>8</sup> | 2.0×10 <sup>5</sup> | 3.0×10 <sup>9</sup> |
| RN8406 (pfu)     | Lm      | <1                                                             |                     | <1                  |                     |

tru – transducing units; pfu – plaque-forming units

1. Chen, J. & Novick, R. P. Phage-mediated intergeneric transfer of toxin genes. *Science* **323**, 139–141 (2009).
