# Supplementary material
Source: PubMed Central journal article supplement (PMC3522866)

S1 | Lineup of SaPI origins. Arrows indicate AT-rich regions.

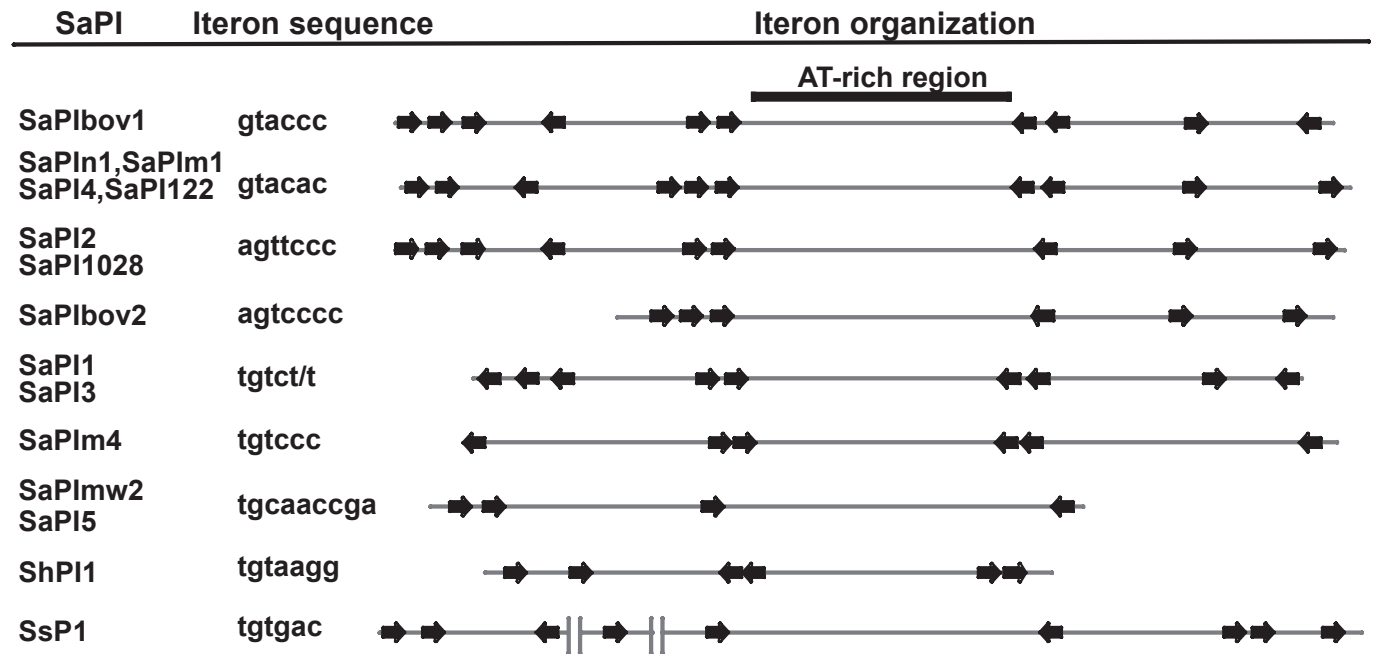

Supplement: NIHMS241097-supplement-S1.pdf [file NIHMS241097-supplement-S1.pdf]
